# Supplementary material for: An aptamer-tethered DNA origami amplifier for sensitive and accurate imaging of intracellular microRNA
Source: Royal Society of Chemistry journal article supplement (doi:10.1039/d1nr06399e), 2021-12-13
Supplement: d1nr06399e1.pdf [file d1nr06399e1.pdf]

# **Aptamer-tethered DNA Origami Amplifier for Sensitive and Accurate Imaging of Intracellular MicroRNAs**

Chao Xing<sup>a†</sup>, Shan Chen<sup>b†</sup>, Qitian Lin<sup>c</sup>, Yuhong Lin<sup>c</sup>, Min Wang<sup>c</sup>, Jun Wang<sup>a\*</sup> and Chunhua Lu<sup>c\*</sup>

a. Fujian Key Laboratory of Functional Marine Sensing Materials, Center for Advanced Marine Materials and Smart Sensors, College of Materials and Chemical Engineering, Minjiang University, Fuzhou 350108, P. R. China;

b. College of Geography and Ocean, Minjiang University, Fuzhou 350108, P. R. China;

c. College of Chemistry, Fuzhou University, Fuzhou 350116, P. R. China;

E-mail: wangjun2@mju.edu.cn (Jun Wang), chunhualu@fzu.edu.cn (Chunhua Lu)

† These authors contributed equally to this work.

## **Chemicals and Materials**

TAE/TBE buffer and Acrylamide/bis-acrylamide (30%) were purchased from Sangon Biotechnology Co., Ltd. (Shanghai, China). All oligonucleotides were synthesized and purified using HPLC by Shangya Biotechnology (Fuzhou, China). Dulbecco's Phosphate-Buffered Saline (DPBS), Minimum Essential Medium (MEM), RPMI 1640 medium, penicillin-streptomycin solution (100 mg/mL) and fetal bovine serum (FBS) were obtained from GIBCO (USA). L02, HeLa, MCF-7 cell lines were obtained from ATCC (Manassas, VA). Amicon ultra 100 kDa MWCO were purchased from Millipore. Double-distilled ultrapure water (18.2 MΩ cm) was used (Milli-Q, Millipore Corp., Bedford, MA).

## **Instruments**

The assembling of DNA was achieved on a C1000 Touch™ Thermal Cycler (Bio-Rad). Gel electrophoresis images were obtained by a ChemiDoc System from Bio-Rad Laboratories. AFM images were captured using a Multimode 8 microscope (Scanasyt in fluid mode, Bruker, Germany). The fluorescence spectra were measured by a Cary Eclipse Fluorimeter (Varian Inc). Confocal microscopy imaging was analyzed with a NIKON-A1 laser-scanning confocal microscopy. Flow cytometric assay was operated using a FACS Canoto flow cytometer (BD Bioscience, U.S.A.). CCK-8 results were obtained from a SH-1000 Lab microplate reader.

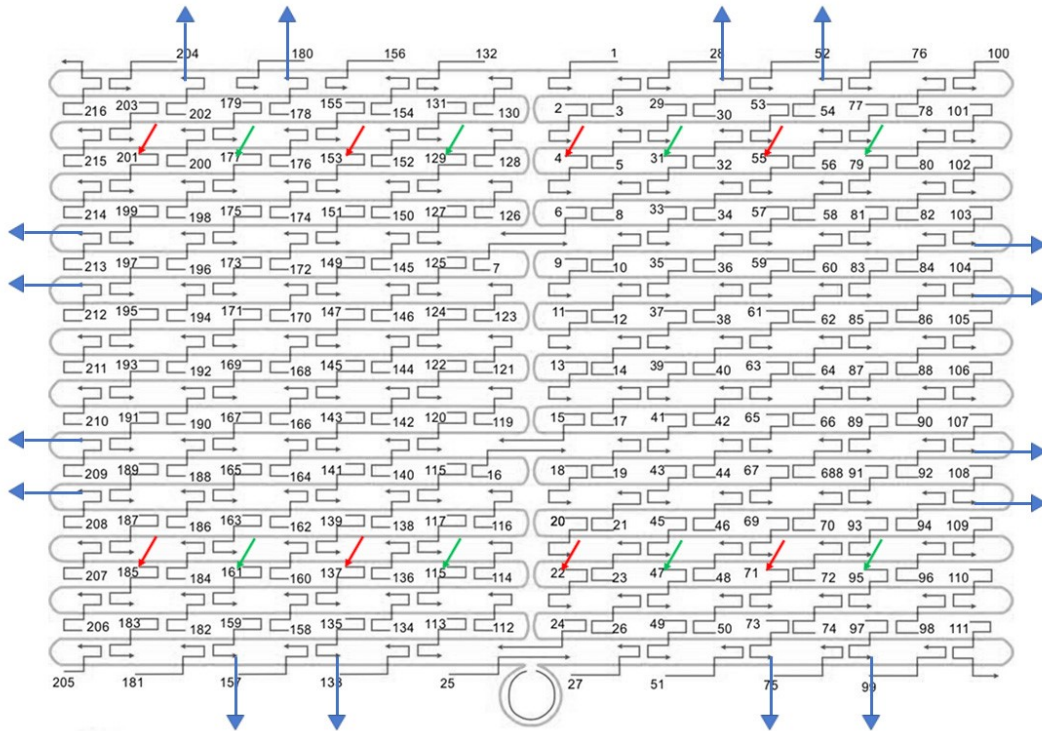

Figure s1. The design of the ADOA structure. M13mp18 single-stranded DNA (gray), staple strands (black) and capture strands (red and green) were fabricated into rectangular origami. Capture strands are extended at the 5'-end with ssDNA composed of binding sites on the surface of rectangular origami. 16 targeting strands (blue) with 3'-end extended AS1411 sequences are placed at the four edges of the rectangle.

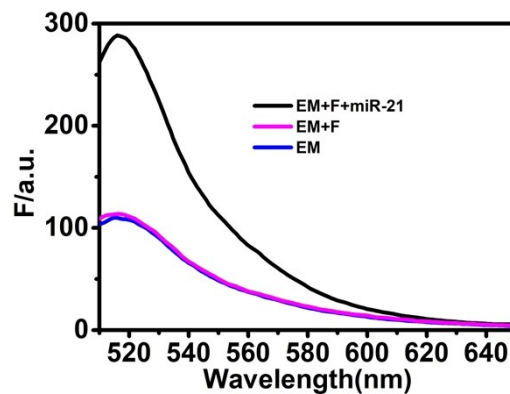

Figure s2. Fluorescence spectra of ADOA response to target miR-21 in vitro.

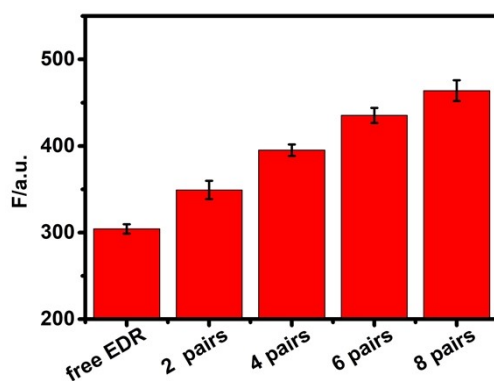

Figure s3. Fluorescence intensity of the free EDR, and 2, 4, 6 pairs of EDR modules self-assembled on DNA origami in response to 10 nM miR-21. Error bars represented variations between three replicate measurements.

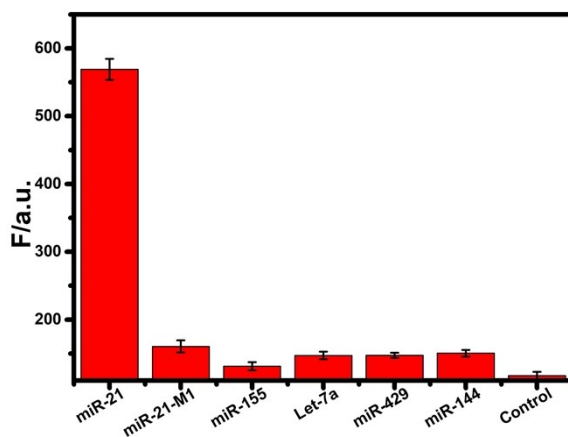

Figure s4. Specificity of the ADOA for several miRNA targets. Error bars were estimated from three replicate measurements.

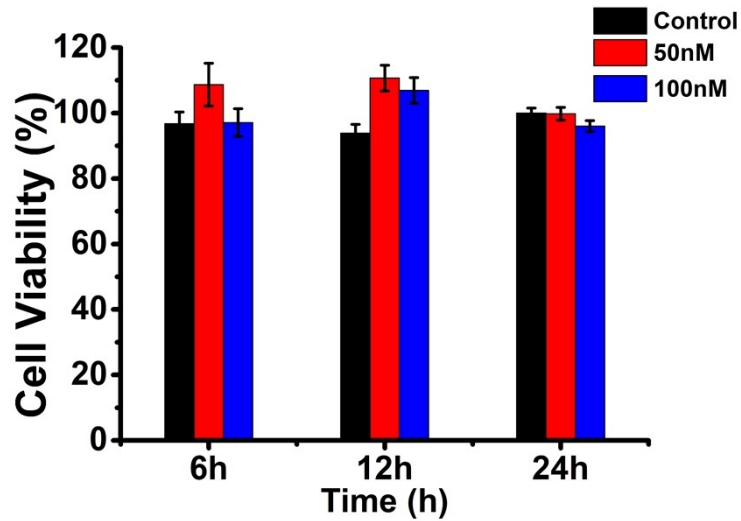

Figure s5. Cytotoxicity of the ADOA incubated with MCF-7 cells at different concentrations of probes.

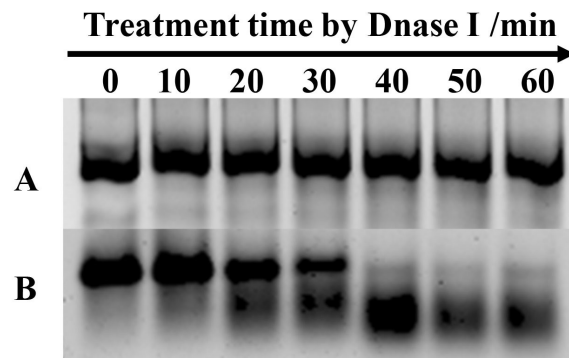

Figure s6. Electrophoresis characterization for the degradation of ADOA (A) and EBs (B) treated with 0.5U/mL Dnase I.

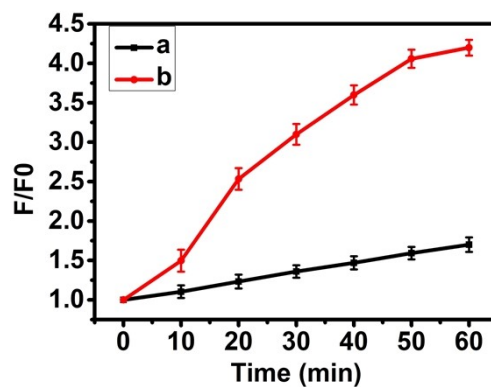

Figure s7. Fluorescence analysis of the degradation of ADOA (a) and EBs (b) treated with 0.5U/mL Dnase I.

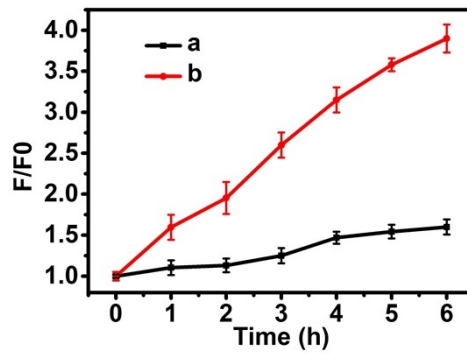

Figure s8. Comparison of nuclease stability of ADOA (a) and EBs (b) in 10% FBS.

The ADOA system is better able to resist the degradation of the DNase I and FBS compared to free EB probes likely because the rigidity, compact organization, and charge density of the origami structure decrease its susceptibility to degradation and propensity to interact with DNase I.

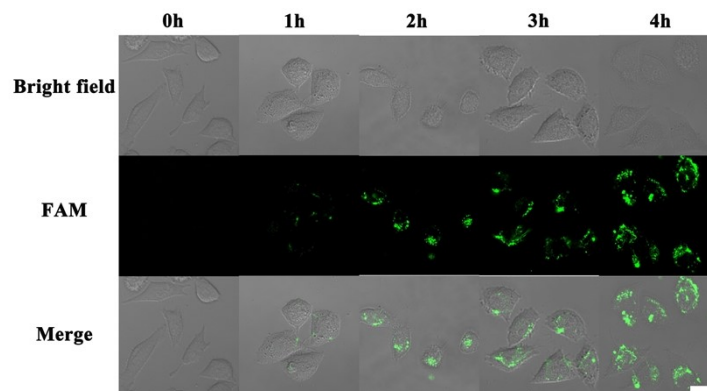

Figure s9. Optimization of incubation time for ADOA in living cells. MCF-7 cells were incubated with ADOA for different time points at 37 °C for confocal microscopy. Scale bars are 20  $\mu\text{m}$ .

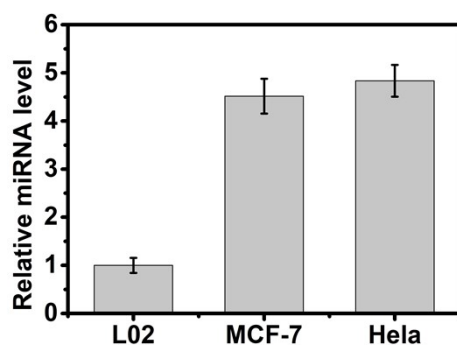

Figure s10. qRT-PCR analysis of relative expression levels of miR-21 in L02 cells, MCF-7 cells and HeLa cells.

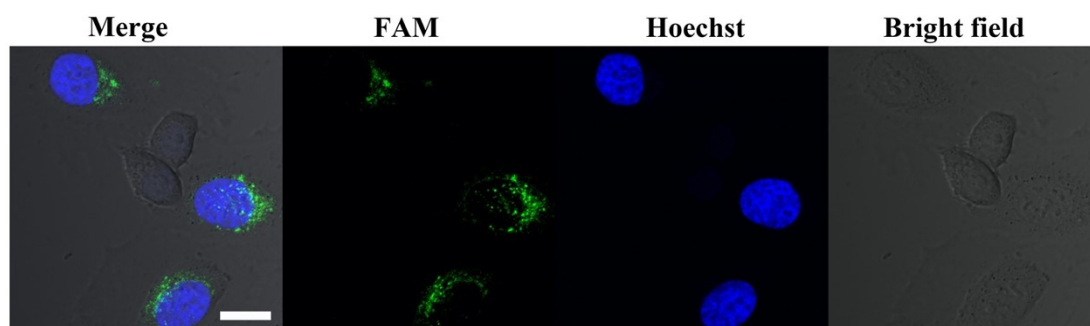

Figure s11. Confocal microscopic images of the co-culture L02 and HeLa cells after being incubated with ADOA. Scare bar: 20  $\mu$ m.

HeLa cells were first cultured in 1640 medium with 10% fetal calf serum at 37 °C in a 5% CO<sub>2</sub> atmosphere. Then, the cells were incubated with 1  $\mu$ M Hoechst dye for 10 min and then washed with PBS. Afterward, the above HeLa cells were cultured with L02 cells for 12h. then, the co-cultured HeLa and L02 cells were incubated with ADOA for 4 h. Finally, the cells were washed with PBS before fluorescence imaging.

**Table S1. Sequences of the staple strands for the rectangular DNA origami.**

| Name | Sequence (5'-3')                  |
|------|-----------------------------------|
| 1    | CAAGCCAATAGGAAC CCATGTACAAACAGTT  |
| 2    | AATGCCCCGTAACAGT GCCCGTATCTCCCTCA |
| 3    | TGCCTTGACTGCCTAT TTCGGAACAGGGATAG |
| 4    | GAGCCGCCCCACCACC GGAACCGCGACGGAAA |
| 5    | AACCAGAGACCCTCAG AACCGCCAGGGGTCAG |

---

6 TTATTCATAGGGAAGG TAAATATTCATTCAGT  
7 CATAACCCGAGGCATA GTAAGAGCTTTTTAAG  
8 ATTGAGGGTAAAGGTG AATTATCAATCACCGG  
9 AAAAGTAATATCTTAC CGAAGCCCTCCAGAG  
10 GCAATAGCGCAGATAG CCGAACAATTCAACCG  
11 CCTAATTTACGCTAAC GAGCGTCTAATCAATA  
12 TCTTACCAGCCAGTTA CAAAATAAATGAAATA  
13 ATCGGCTGCGAGCATG TAGAAACCTATCATAT  
14 CTAATTTATCTTTCCT TATCATTTCATCCTGAA  
15 GCGTTATAGAAAAAGC CTGTTTAGAAGGCCGG  
16 GCTCATTTCGCATTA AATTTTTGAGCTTAGA  
17 AATTACTACAAATTCT TACCAGTAATCCCATC  
18 TTAAGACGTTGAAAAC ATAGCGATAACAGTAC  
19 TAGAATCCCTGAGAAG AGTCAATAGGAATCAT  
20 CTTTTACACAGATGAA TATACAGTAAACAATT  
21 TTTAACGTTTCGGGAGA AACAATAATTTTCCCT  
22 CGACA ACTAAGTATTA GACTTTACAATACCGA  
23 GGATTTAGCGTATTAA ATCCTTTGTTTTCAGG  
24 ACGAACCAAAACATCG CCATTAATGGTGGTT  
25 GAACGTGGCGAGAAAG GAAGGGAACAAACTAT  
26 TAGCCCTACCAGCAGA AGATAAAAACATTTGA  
27 CGGCCTTGCTGGTAAT ATCCAGAACGAACTGA  
28 CTCAGAGCCACCACCC TCATTTTCCTATTATT  
29 CTGAAACAGGTAATAA GTTTTAACCCCTCAGA  
30 AGTG TACTTGAAAGTA TTAAGAGGCCGCCACC  
31 GCCACCACTCTTTTCA TAATCAAACCGTCACC  
32 GTTTGCCACCTCAGAG CCGCCACCGATACAGG  
33 GACTTGAGAGACAAAA GGGCGACAAGTTACCA  
34 AGCGCCAACCATTTGG GAATTAGATTATTAGC  
35 GAAGGAAAATAAGAGC AAGAAACAACAGCCAT  
36 GCCCAATACCGAGGAA ACGCAATAGGTTTACC  
37 ATTATTTAACCCAGCT ACAATTTTCAAGAACG



---

38 TATTTTGCTCCCAATC CAAATAAGTGAGTTAA  
39 GGTATTAAGAACAAGA AAAATAATTAAGCCA  
40 TAAGTCCTACCAAGTA CCGCACTCTTAGTTGC  
41 ACGCTCAAAATAAGAA TAAACACCGTGAATTT  
42 AGGCGTTACAGTAGGG CTTAATTGACAATAGA  
43 ATCAAAATCGTCGCTA TTAATTAACGGATTCTG  
44 CTGTAAATCATAGGTC TGAGAGACGATAAATA  
45 CCTGATTGAAAGAAAT TGCCTAGACCCGAACG  
46 ACAGAAATCTTTGAAT ACCAAGTTCCTTGCTT  
47 TTATTAATGCCGTCOA TAGATAATCAGAGGTG  
48 AGATTAGATTTAAAAG TTTGAGTACACGTAAA  
49 AGGCGGTCATTAGTCT TTAATGCGCAATATTA  
50 GAATGGCTAGTATTAA CACCGCCTCAACTAAT  
51 CCGCCAGCCATTGCAA CAGGAAAAATATTTTT  
52 CCCTCAGAACCGCCAC CCTCAGAACTGAGACT  
53 CCTCAAGAATACATGG CTTTTGATAGAACCAC  
54 TAAGCGTCGAAGGATT AGGATTAGTACCGCCA  
55 CACCAGAGTTCGGTCA TAGCCCCCGCCAGCAA  
56 TCGGCATTCCGCGCC AGCATTGACGTTCCAG  
57 AATCACCAAATAGAAA ATTCATATATAACGGA  
58 TCACAATCGTAGCACC ATTACCATCGTTTTCA  
59 ATACCCAAGATAACCC ACAAGAATAAACGATT  
60 ATCAGAGAAAGAACTG GCATGATTTTATTTTG  
61 TTTTGTTAAGCCTTA AATCAAGAATCGAGAA  
62 AGGTTTTGAACGTCAA AAATGAAAGCGCTAAT  
63 CAAGCAAGACGCGCCT GTTTATCAAGAATCGC  
64 AATGCAGACCGTTTTT ATTTTCATCTTGCGGG  
65 CATATTTAGAAATACC GACCGTGTTACCTTTT  
66 AATGGTTTACAACGCC AACATGTAGTTCAGCT  
67 TAACCTCCATATGTGA GTGAATAAACAAAATC  
68 AAATCAATGGCTTAGG TTGGGTTACTAAATTT  
69 GCGCAGAGATATCAAA ATTATTTGACATTATC

---

70 AACCTACCGCGAATTA TTCATTTCCAGTACAT  
71 ATTTTGGCTCTTTAGG AGCACTAAGCAACAGT  
72 CTAAAATAGAACAAAG AAACCACCAGGGTTAG  
73 GCCACGCTATACGTGG CACAGACAACGCTCAT  
74 GCGTAAGAGAGAGCCA GCAGCAAAAAGGTTAT  
75 GGAAATACCTACATTT TGACGCTCACCTGAAA  
76 TATCACCGTACTCAGG AGGTTTAGCGGGGTTT  
77 TGCTCAGTCAGTCTCT GAATTTACCAGGAGGT  
78 GGAAAGCGACCAGGCG GATAAGTGAATAGGTG  
79 TGAGGCAGGCGTCAGA CTGTAGCGTAGCAAGG  
80 TGCTTTAGTCAGACG ATTGGCCTGCCAGAAT  
81 CCGGAAACACACCACG GAATAAGTAAGACTCC  
82 ACGCAAAGGTCACCAA TGAAACCAATCAAGTT  
83 TTATTACGGTCAGAGG GTAATTGAATAGCAGC  
84 TGAACAAACAGTATGT TAGCAAATAAAAAGAA  
85 CTTTACAGTTAGCGAA CCTCCCGACGTAGGAA  
86 GAGGCGTTAGAGAATA ACATAAAAGAACACCC  
87 TCATTACCCGACAATA AACAACATATTTAGGC  
88 CCAGACGAGCGCCCAA TAGCAAGCAAGAACGC  
89 AGAGGCATAATTTTCAT CTTCTGACTATAACTA  
90 TTTTAGTTTTTCGAGC CAGTAATAAATTCTGT  
91 TATGTAAACCTTTTTT AATGGAAAAATTACCT  
92 TTGAATTATGCTGATG CAAATCCACAAATATA  
93 GAGCAAAAACCTTCTGA ATAATGGAAGAAGGAG  
94 TGGATTATGAAGATGA TGAAACAAAATTTTCAT  
95 CGGAATTATTGAAAGG AATTGAGGTGAAAAAT  
96 ATCAACAGTCATCATA TTCCTGATTGATTGTT  
97 CTAAAGCAAGATAGAA CCCTTCTGAATCGTCT  
98 GCCAACAGTCACCTTG CTGAACCTGTTGGCAA  
99 GAAATGGATTATTTAC ATTGGCAGACATTCTG  
100 TTTT TATAAGTA TAGCCCGGCCGTCGAGAGGGTTGA  
101 TTTT ATAAATCC TCATTAAATGATATTCACAAACAA

---

102 TTTT AATCAGTA GCGACAGATCGATAGCAGCACCGT  
103 TTTT TAAAGGTG GCAACATAGTAGAAAATACATACA  
104 TTTT GACGGGAG AATTA ACTACAGGGAAGCGCATT  
105 TTTT GCTTATCC GGTATTCTAAATCAGATATAGAAG  
106 TTTT CGACAAAA GGTAAGTAGAGAATATAAAGTAC  
107 TTTT CGCGAGAA AACTTTTTATCGCAAGACAAAGAA  
108 TTTT ATTAATTA CATTTAACACATCAAGAAAACAAA  
109 TTTT TTCATCAA TATAATCCTATCAGATGATGGCAA  
110 TTTT AATCAATA TCTGGTCACAAATATCAAACCCCTC  
111 TTTT ACCAGTAA TAAAAGGGATTACCA GTCACACG TTTT  
112 CCGAAATCCGAAAATC CTGTTTGAAGCCGGAA  
113 CCAGCAGGGGCAAAT CCCTTATAAAGCCGGC  
114 GCATAAAGTTCCACAC AACATACGAAGCGCCA  
115 GCTCACAATGTAAAGC CTGGGGTGGGTTTGCC  
116 TTCGCCATTGCCGGAA ACCAGGCATTAATCA  
117 GCTTCTGGTCAGGCTG CGCAACTGTGTTATCC  
118 GTTAAAATTTTAACCA ATAGGAACCCGGCACC  
119 AGACAGTCATTCAAAA GGGTGAGAAGCTATAT  
120 AGGTAAAGAAATCACC ATCAATATAATATTTT  
121 TTTCAATTTGGTCAATA ACCTGTTTATATCGCG  
122 TCGCAAATGGGGCGCG AGCTGAAATAATGTGT  
123 TTTTAATTGCCCGAAA GACTTCAAAACACTAT  
124 AAGAGGAACGAGCTTC AAAGCGAAGATACATT  
125 GGAATTACTCGTTTAC CAGACGACAAAAGATT  
126 GAATAAGGACGTAACA AAGCTGCTCTAAAACA  
127 CCAAATCACTTGCCCT GACGAGAACGCCAAAA  
128 CTCATCTTGAGGCAAA AGAATACAGTGAATTT  
129 AAACGAAATGACCCCC AGCGATTATTCATTAC  
130 CTTAAACATCAGCTTG CTTTCGAGCGTAACAC  
131 TCGGTTTAGCTTGATA CCGATAGTCCAACCTA  
132 TGAGTTTCGTCACCAG TACAAACTTAATTGTA  
133 CCCCATTAGAGCTT GACGGGGAAATCAAAA

---

134 GAATAGCCGCAAGCGG TCCACGCTCCTAATGA  
135 GAGTTGCACGAGATAG GGTGAGTAAGGGAGC  
136 GTGAGCTAGTTTCCTG TGTGAAATTTGGGAAG  
137 TCATAGCTACTCACAT TAATTGCGCCCTGAGA  
138 GCGATCGCACTCCAG CCAGCTTTGCCATCAA  
139 GAAGATCGGTGCGGGC CTCTTCGCAATCATGG  
140 AAATAATTTTAAATTG TAAACGTTGATATTCA  
141 GCAAATATCGCGTCTG GCCTTCCTGGCCTCAG  
142 ACCGTTCTAAATGCAA TGCCTGAGAGGTGGCA  
143 TATATTTTAGCTGATA AATTAATGTTGTATAA  
144 TCAATTCTTTTAGTTT GACCATTACCAGACCG  
145 CGAGTAGAACTAATAG TAGTAGCAAACCCTCA  
146 GAAGCAAAAAAGCGGA TTGCATCAGATAAAAA  
147 TCAGAAGCCTCCAACA GGTCAGGATCTGCGAA  
148 CAAAAATATAATGCAG ATACATAAACACCAGA  
149 CATTCAACGCGAGAGG CTTTTGCATATTATAG  
150 ACGAGTAGTGACAAGA ACCGGATATACCAAGC  
151 AGTAATCTTAAATTGG GCTTGAGAGAATACCA  
152 GCGAAACATGCCACTA CGAAGGCATGCGCCGA  
153 ATACGTAAAAGTACAA CGGAGATTTTCATCAAG  
154 CAATGACACTCCAAAA GGAGCCTTACAACGCC  
155 AAAAAAGGACAACCAT CGCCCACGCGGGTAAA  
156 TGTAGCATTCCACAGA CAGCCCTCATCTCCAA  
157 GTAAAGCACTAAATCG GAACCCTAGTTGTTCC  
158 AGTTTGGAGCCCTTCA CCGCCTGGTTGCGCTC  
159 AGCTGATTACAAGAGT CCACTATTGAGGTGCC  
160 ACTGCCC GCCGAGCTC GAATTCGTTATTACGC  
161 CCCGGTACTTTCCAG TCGGGAAACGGGCAAC  
162 CAGCTGGCGGACGACG ACAGTATCGTAGCCAG  
163 GTTTGAGGGAAAGGGG GATGTGCTAGAGGATC  
164 CTTTCATCCCCAAAAA CAGGAAGACCGGAGAG  
165 AGAAAAGCAACATTAA ATGTGAGCATCTGCCA

---

166 GGTAGCTAGGATAAAA ATTTTGTAGTTAACATC  
167 CAACGCAATTTTGTAG AGATCTACTGATAATC  
168 CAATAAATACAGTTGA TTCCCAATTTAGAGAG  
169 TCCATATACATACAGG CAAGGCAACTTTATTT  
170 TACCTTTAAGGTCTTT ACCCTGACAAAGAAGT  
171 CAAAAATCATTGCTCC TTTTGATAAGTTTCAT  
172 TTTGCCAGATCAGTTG AGATTTAGTGGTTTAA  
173 AAAGATTCAGGGGGTA ATAGTAAACCATAAAT  
174 TTTCAACTATAGGCTG GCTGACCTTGATCAT  
175 CCAGGCGCTTAATCAT TGTGAATTACAGGTAG  
176 CGCCTGATGGAAGTTT CCATTAACATAACCG  
177 TTTTCATGAAAATTGTG TCGAAATCTGTACAGA  
178 ATATATTCTTTTTTCA CGTTGAAAATAGTTAG  
179 AATAATAAGGTCGCTG AGGCTTGCAAAGACTT  
180 CGTAACGATCTAAAGT TTTGTCGTGAATTGCG  
181 ACCCAAATCAAGTTTT TTGGGGTCAAAGAACG  
182 TGGACTCCCTTTTAC CAGTGAGACCTGTCGT  
183 TGGTTTTTAACGTCAA AGGGCGAAGAACCATC  
184 GCCAGCTGCCTGCAGG TCGACTCTGCAAGGCG  
185 CTTGCATGCATTAATG AATCGGCCCGCCAGGG  
186 ATTAAGTTCGCATCGT AACCGTGCGAGTAACA  
187 TAGATGGGGGGTAACG CCAGGGTTGTGCCAAG  
188 ACCCGTCGTCATATGT ACCCCGGTAAAGGCTA  
189 CATGTCAAGATTCTCC GTGGGAACCGTTGGTG  
190 TCAGGTCACTTTTGCG GGAGAAGCAGAATTAG  
191 CTGTAATATTGCCTGA GAGTCTGGAAAAC TAG  
192 CAAAATTAAGTACGG TGTCTGGAAGAGGTCA  
193 TGCAACTAAGCAATAA AGCCTCAGTTATGACC  
194 TTTTGTGCGCAGAAAAC GAGAATGAATGTTTAG  
195 AAACAGTTGATGGCTT AGAGCTTATTTAAATA  
196 ACTGGATAACGGAACA ACATTATTACCTTATG  
197 ACGAACTAGCGTCCAA TACTGCGGAATGCTTT

---

|         |                                              |
|---------|----------------------------------------------|
| 198     | CGATTTTAGAGGACAG ATGAACGGCGCGACCT            |
| 199     | CTTTGAAAAGAACTGG CTCATTATTTAATAAA            |
| 200     | GCTCCATGAGAGGCTT TGAGGACTAGGGAGTT            |
| 201     | ACGGCTACTTACTTAG CCGGAACGCTGACCAA            |
| 202     | AAAGGCCGAAAGGAAC AACTAAAGCTTTCCAG            |
| 203     | GAGAATAGCTTTTGCG GGATCGTCGGGTAGCA            |
| 204     | ACGTTAGTAAATGAAT TTTCTGTAAGCGGAGT            |
| 205     | TTTT CGATGGCC CACTACGTAAACCGTC TATCAGGG      |
| 206     | TTTT CGGTTTGC GTATTGGGAACGCGCG GGGAGAGG      |
| 207     | TTTT TGTA AAC GACGGCCATTCCCAGT CACGACGT      |
| 208     | TTTT GTAATGGG ATAGGTCAAAACGGCG GATTGACC      |
| 209     | TTTT GATGAACG GTAATCGTAGCAAACA AGAGAATC      |
| 210     | TTTT GGTTGTAC CAAAAACAAGCATAAA GCTAAATC      |
| 211     | TTTT CTGTAGCT CAACATGTATTGCTGA ATATAATG      |
| 212     | TTTT CATTGAAT CCCCCTCAAATCGTCA TAAATATT      |
| 213     | TTTT GGAAGAAA AATCTACGACCAGTCA GGACGTTG      |
| 214     | TTTT TCATAAGG GAACCGAAAGGCGCAG ACGGTCAA      |
| 215     | TTTT GACAGCAT CGGAACGAACCCTCAG CAGCGAAA      |
| 216     | TTTT AACTTTCA ACAGTTTCTGGGATTT TGCTAAAC TTTT |
| Loop 1  | AACATCACTTGCCTGAGTAGAAGAACT                  |
| Loop 2  | TGTAGCAATACTTCTTTGATTAGTAAT                  |
| Loop 3  | AGTCTGTCCATCACGCAAATTAACCGT                  |
| Loop 4  | ATAATCAGTGAGGCCACCGAGTAAAAG                  |
| Loop 5  | ACGCCAGAATCCTGAGAAGTGTTTTT                   |
| Loop 6  | TTAAAGGGATTTTAGACAGGAACGGT                   |
| Loop 7  | AGAGCGGGAGCTAAACAGGAGGCCGA                   |
| Loop 8  | TATAACGTGCTTTCCTCGTTAGAATC                   |
| Loop 9  | GTACTATGGTTGCTTTGACGAGCACG                   |
| Loop 10 | GCGCTTAATGCGCCGCTACAGGGCGC                   |

---

**Table S2. Sequences of EDR, the modified staple strands and other oligonucleotides.**

| Name             | Sequence (5'-3')                                                             |
|------------------|------------------------------------------------------------------------------|
| E1               | TCAACATCAGTCTGATAAGCTAAGGGCCGTAAGAGAGCTGTAGAT<br>TGGATCG                     |
| F                | CGATCCAATCTACAGCTCTCTTACGGCCCTTAGCTTATCAGACTGA                               |
| E2               | CCACATACATCATATTCCTTAGCTTATCAGACTGA                                          |
| E3               | CAGTCACTCGATCCAATCTACAGCTCTCTTACGG                                           |
| Linker-E1        | <b>GATTAATCCTGT</b> TCAACATCAGTCTGATAAGCTAAGGGCCGTAAG<br>AGAGCTGTAGATTGGATCG |
| Linker-F         | <b>AATAATCTCGAG</b> CGATCCAATCTACAGCTCTCTTACGGCCCTTAGC<br>TTATCAGACTGA       |
| 201-E1           | <b>ACAGGATTAATC</b> ACGGCTACTTACTTAGCCGGAACGCTGACCAA                         |
| 153-E1           | <b>ACAGGATTAATC</b> ATACGTAAAAGTACAACGGAGATTTTCATCAAG                        |
| 4-E1             | <b>ACAGGATTAATC</b> GAGCCGCCACCACCGGAACCGCGACGGAAA                           |
| 55-E1            | <b>ACAGGATTAATC</b> CACCAGAGTTCGGTCATAGCCCCGCCAGCAA                          |
| 185-E1           | <b>ACAGGATTAATC</b> CTTGCATGCATTAATGAATCGGCCCGCCAGGG                         |
| 137-E1           | <b>ACAGGATTAATC</b> TCATAGCTACTCACATTAATTGCGCCCTGAGA                         |
| 22-E1            | <b>ACAGGATTAATC</b> CGACAACCTAAGTATTAGACTTTACAATACCGA                        |
| 71-E1            | <b>ACAGGATTAATC</b> ATTTTGCCTTTTAGGAGCACTAAGCAACAGT                          |
| 177-E2           | <b>CTCGAGATTATT</b> TTTCATGAAAATTGTGTCGAAATCTGTACAGA                         |
| 129-E2           | <b>CTCGAGATTATT</b> AAACGAAATGACCCCCAGCGATTATTCATTAC                         |
| 31-E2            | <b>CTCGAGATTATT</b> GCCACCACTCTTTTCATAATCAAACCGTCACC                         |
| 79-E2            | <b>CTCGAGATTATT</b> TGAGGCAGGCGTCAGACTGTAGCGTAGCAAGG                         |
| 161-E2           | <b>CTCGAGATTATT</b> CCCGGGTACTTTCCAGTCGGGAAACGGGCAAC                         |
| 115-E2           | <b>CTCGAGATTATT</b> GCTCACAATGTAAAGCCTGGGGTGGGTTTGCC                         |
| 47-E2            | <b>CTCGAGATTATT</b> TTATTAATGCCGTC AATAGATAATCAGAGGTG                        |
| 95-E2            | <b>CTCGAGATTATT</b> CGGAATTATTGAAAGGAATTGAGGTGAAAAAT                         |
| miR-21 inhibitor | <b>UCAACAUCAGUCUGAUAAAGCUA</b>                                               |
| miR-21 mimic     | <b>UAGCUUAUCAGACUGAUGUUGA</b>                                                |
| miR-21           | UAGCUUAUCAGACUGAUGUUGA                                                       |
| target DNA       | TAGCTTATCAGACTGATGTTGA                                                       |
| miR-155          | UUAAUGC UAAUCGUGAUAGGGGU                                                     |

|                      |                                              |
|----------------------|----------------------------------------------|
| miR-429              | UAAUACUGUCUGGUA AAAACCGU                     |
| miR-144              | UACAGUAUAGAUGAUGUACU                         |
| let-7a               | UGAGGUAGUAGGUUGUAUAGUU                       |
| miR-21 RT-<br>primer | CTCAACTGGTGTCTGGAGTCGGCAATTCAGTTGAGTCAACATCA |

The red Letters represent E1 complementation region. The blue letters represent F complementation region. The green Letters indicate phosphorothioate modification.
